# Supplementary material for: Profilin 2 promotes growth, metastasis, and angiogenesis of small cell lung cancer through cancer-derived exosomes
Source: publisher site journal article supplement (doi:10.18632/aging.202213), 2020-11-21
Supplement: Supplementary file [file aging-v12i24-202213-supplementary-material-SD1.pdf]

## SUPPLEMENTARY FIGURES

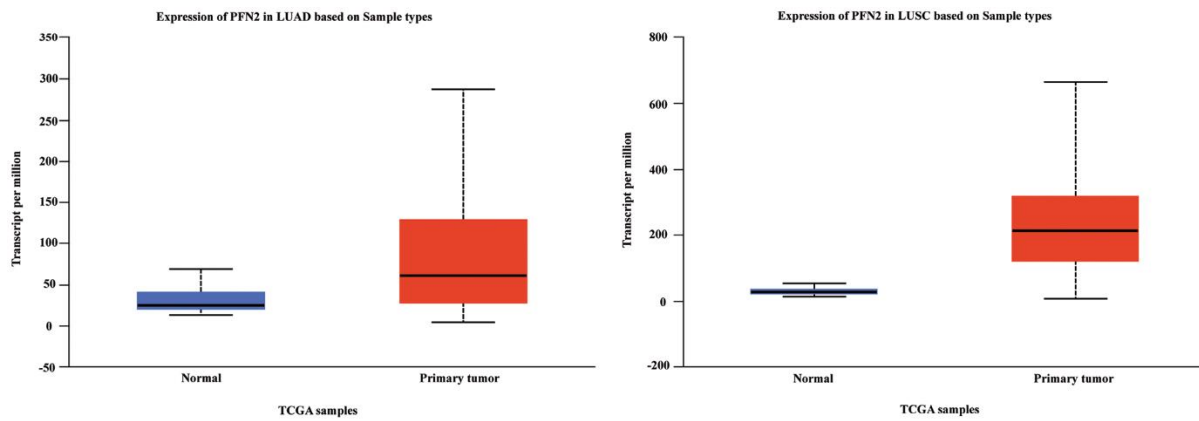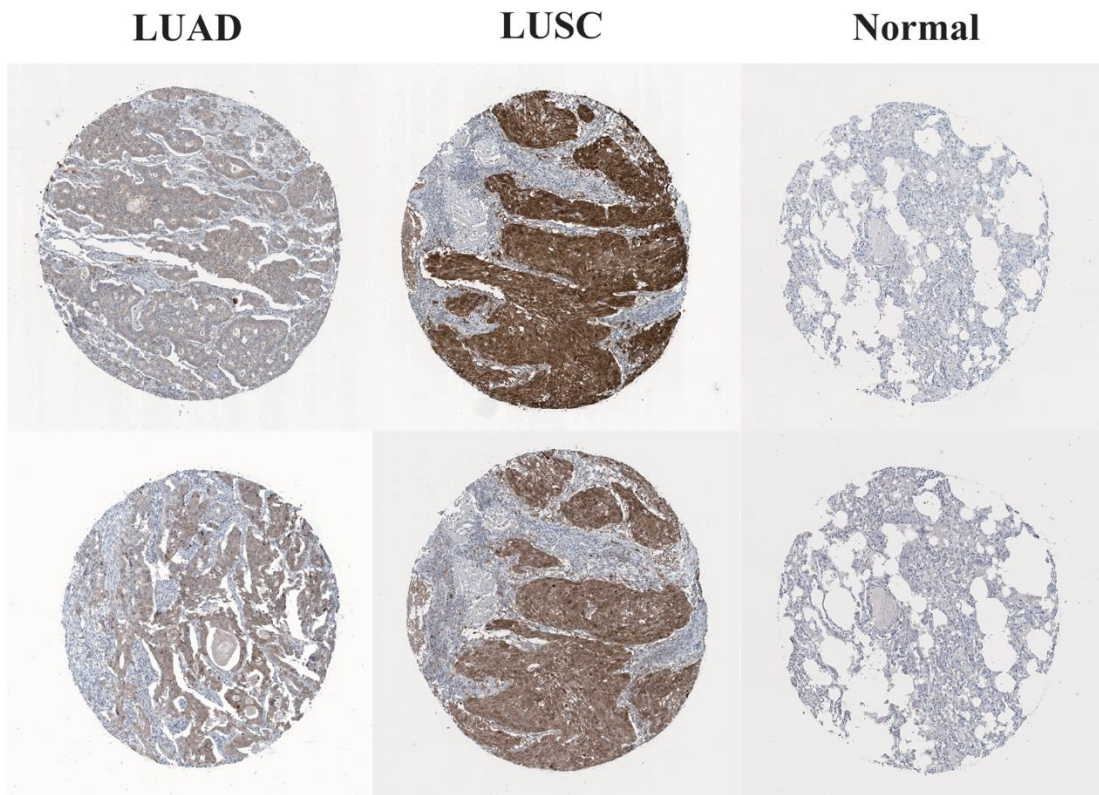

Supplementary Figure 1. PFN2 is highly expressed in non-small-cell lung cancer (NSCLC) but not in normal lung tissues searched in the TCGA database.

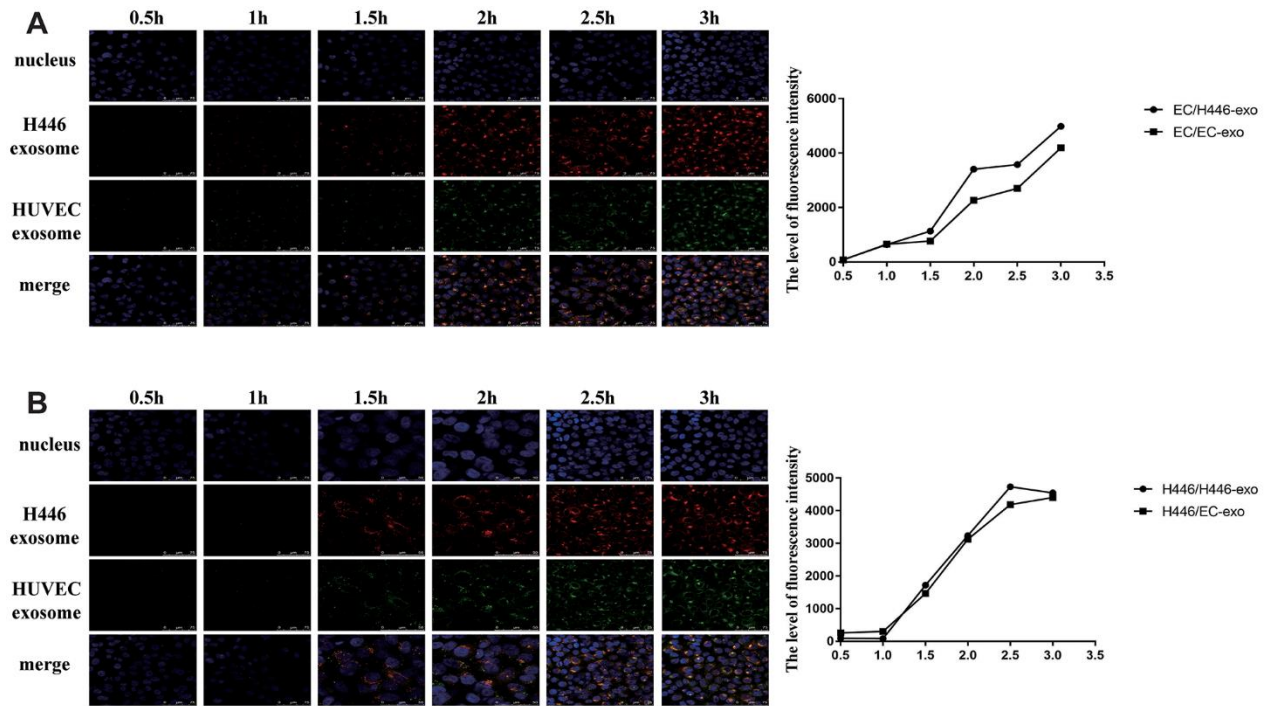

**Supplementary Figure 2. The number of exosomes internalized by H446 cells and ECs within 3 h.** H446 could internalize exosomes derived from H446 cells and ECs, and the amount of exosomes internalized by H446 cells at 2.5 h was similar with that internalized at 3 h (A). Different from H446 cells, ECs could internalize more exosomes at 3 h than at 2.5 h (B). EC, endothelial cells.

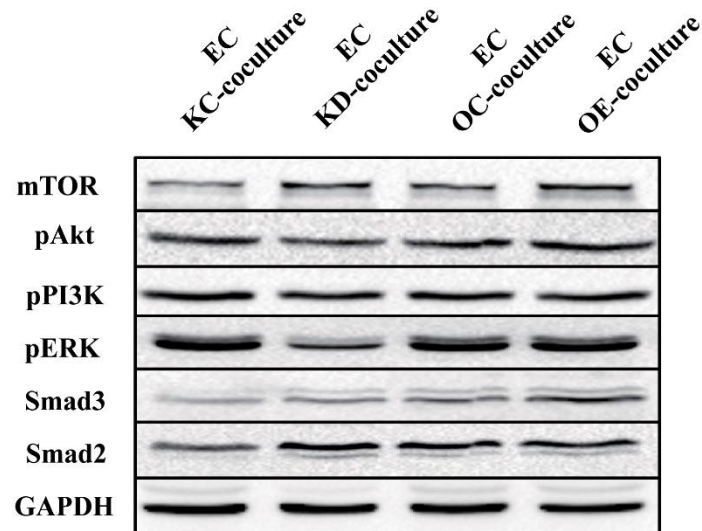

**Supplementary Figure 3. PI3K, AKT, p-AKT, Smad2, and Smad3 expression exhibits no difference between H446-OE and H446-OC co-cultured ECs.**

**non exo treated group**

**KD-exo treated group**

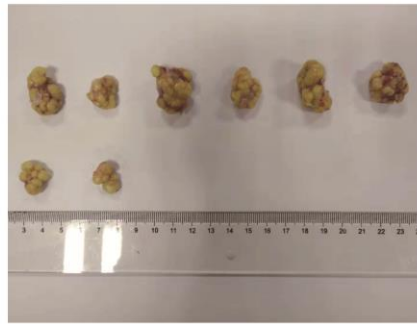

|          | <b>KD-exo treated group</b> |               | <b>non exo treated group(OE group)</b> |               |
|----------|-----------------------------|---------------|----------------------------------------|---------------|
|          | <b>size</b>                 | <b>weight</b> | <b>size</b>                            | <b>weight</b> |
| <b>1</b> | <b>1.5×1cm</b>              | <b>0.9g</b>   | <b>2×1.8cm</b>                         | <b>1.9g</b>   |
| <b>2</b> | <b>1.3×1cm</b>              | <b>0.8g</b>   | <b>1.7×1.5cm</b>                       | <b>1.2g</b>   |
| <b>3</b> |                             |               | <b>2×2cm</b>                           | <b>3.2g</b>   |
| <b>4</b> |                             |               | <b>2×1.5cm</b>                         | <b>2.1g</b>   |
| <b>5</b> |                             |               | <b>2.5×1.5cm</b>                       | <b>3.7g</b>   |
| <b>6</b> |                             |               | <b>2×1.5cm</b>                         | <b>2.6g</b>   |

Supplementary Figure 4. Xenograft tumor mice model with PFN2-overexpressing SCLC cells have smaller tumor size in the group treated by exosomes derived from PFN2-knockdown SCLC cells than in the non-treated group.
